# Supplementary material
Source: PubMed Central journal article supplement (PMC6292502)
Supplement: NIHMS80083-supplement-Supplementary_Table_1.pdf [file NIHMS80083-supplement-Supplementary_Table_1.pdf]

**Supplementary Table 1. Statistics of Cryo-EM Datasets**

| Sample                                                                                | Micrographs (N) | Reconstruction                                                          | Particles (N)                 | Resolution (Å)                                                          |
|---------------------------------------------------------------------------------------|-----------------|-------------------------------------------------------------------------|-------------------------------|-------------------------------------------------------------------------|
| <b>CBF3–CEN3</b><br>(Supplementary Figure 2)                                          | 3,537           |                                                                         | 987,484 Auto-picked particles |                                                                         |
|                                                                                       |                 | CBF3 <sup>core</sup>                                                    | 146,673 (30.6%)               | -                                                                       |
|                                                                                       |                 | Monomeric CBF3–CEN3                                                     | 175,447 (36.6%)               | -                                                                       |
|                                                                                       |                 | Dimeric CBF3–CEN3                                                       | 157,883 (32.8%)               | 4.4                                                                     |
|                                                                                       |                 | CBF3 <sup>msk</sup>                                                     | 198,010                       | 3.0                                                                     |
|                                                                                       |                 | Others (Hybrid and bad particles not included in the 3D classification) | 507,481                       |                                                                         |
| <b>CBF3<sup>core</sup>–Ndc10<sup>DBD</sup></b><br>-/+CEN3<br>(Supplementary Figure 3) | 724<br>1,171    |                                                                         | 757,433 Auto-picked particles |                                                                         |
|                                                                                       |                 | CBF3 <sup>core</sup> –Ndc10 <sup>DBD</sup>                              | 104,938 (31.8%)               | 3.6                                                                     |
|                                                                                       |                 | CBF3 <sup>core</sup>                                                    | 184,356 (55.8%)               | 3.9                                                                     |
|                                                                                       |                 | Monomeric CBF3 <sup>core</sup> –Ndc10 <sup>DBD</sup> –CEN3              | 27,669 (8.4%)                 | -                                                                       |
|                                                                                       |                 | Dimeric CBF3 <sup>core</sup> –Ndc10 <sup>DBD</sup> –CEN3                | 13,140 (4.0%)                 | -                                                                       |
|                                                                                       |                 | Others (Hybrid and bad particles not included in the 3D classification) | 427,330                       |                                                                         |
| <b>CBF3–CEN3<sup>biotin-avidin</sup></b>                                              | 400             |                                                                         | 113,800 Auto-picked particles |                                                                         |
|                                                                                       |                 | CBF3–CEN3 <sup>biotin-avidin</sup>                                      | 10,889 (15.2%)                | 12.5                                                                    |
|                                                                                       |                 | CBF3 <sup>core</sup>                                                    | 19,626 (27.5%)                | -                                                                       |
|                                                                                       |                 | CBF3 <sup>core</sup> –Ndc10 <sup>DBD</sup>                              | 40,919 (57.3%)                | -                                                                       |
|                                                                                       |                 |                                                                         |                               | Others (Hybrid and bad particles not included in the 3D classification) |
